# Supplementary material for: Development of Chinese-Style Sausage Enriched with Djulis (Chenopodium formosanum Koidz) Using Taguchi Method: Applying Modern Optimization to Indigenous People’s Traditional Food
Source: MDPI journal article supplement (doi:10.3390/foods13010091), 2023-12-26
Supplement: s1 [file s1]

**Table S1.** Correlation coefficients of independent parameters.

|          | <b>A</b> | <b>B</b> | <b>C</b> | <b>D</b> |
|----------|----------|----------|----------|----------|
| <b>A</b> | 1        | 0.525    | 0.237    | 0.634    |
| <b>B</b> | 0.525    | 1        | .951     | -0.325   |
| <b>C</b> | 0.237    | 0.951    | 1        | -0.601   |
| <b>D</b> | 0.634    | -0.325   | -0.601   | 1        |

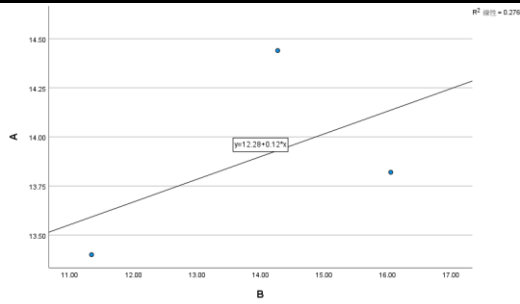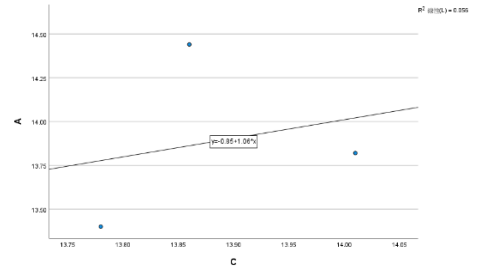

A-B correlation coefficient:0.525

A-C correlation coefficient:0.237

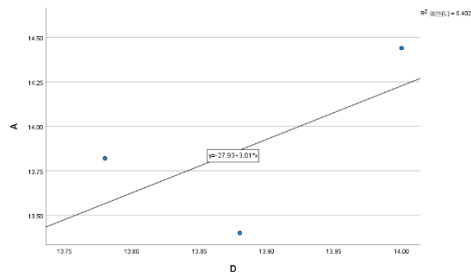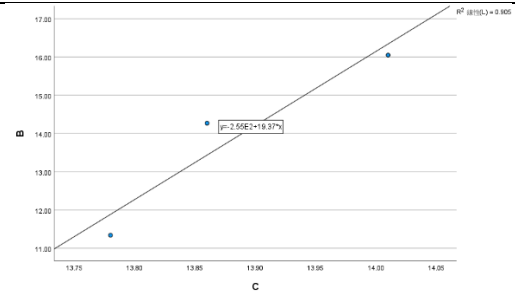

A-D correlation coefficient:0.634

B-C correlation coefficient:0.951

**Figure S1.** Analysis of the interactions between the examined factors.
